# Supplementary material for: Sclerotherapy for hemorrhoidal disease: systematic review and meta-analysis
Source: PubMed Central journal article supplement (PMC10806988; doi:10.1007/s10151-023-02908-w), 2024-01-23

# Contour-enhanced funnel plot

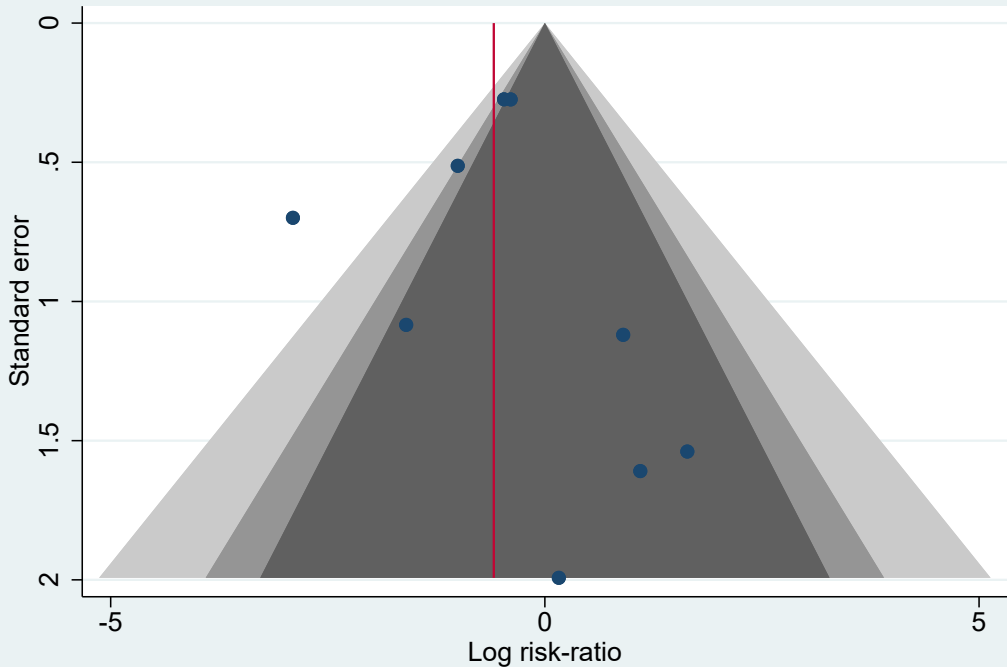

Supplement: 10151_2023_2908_MOESM3_ESM.pdf [file 10151_2023_2908_MOESM3_ESM.pdf]
