# Supplementary material for: Sclerotherapy for hemorrhoidal disease: systematic review and meta-analysis
Source: Springer Nature journal article supplement (doi:10.1007/s10151-023-02908-w), 2024-01-23

# Contour-enhanced funnel plot

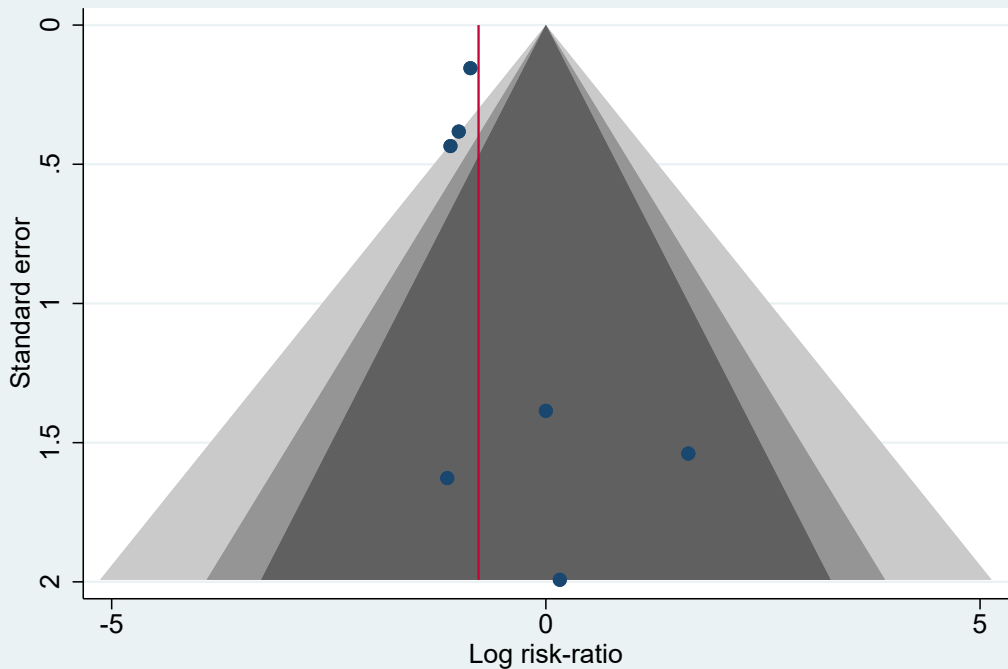

Supplement: MOESM4 [file 26653790]
